# Supplementary material
Source: PubMed Central journal article supplement (PMC5694385)

## **Supporting Information**

### Concise Asymmetric Synthesis of Sex Pheromone of the Tea Tussock Moth

Zhi-Feng Sun, Lu-Nan Zhou, Yifei Meng, Tao Zhang, Zhen-Ting Du,\* and  
Huaji Zheng\*

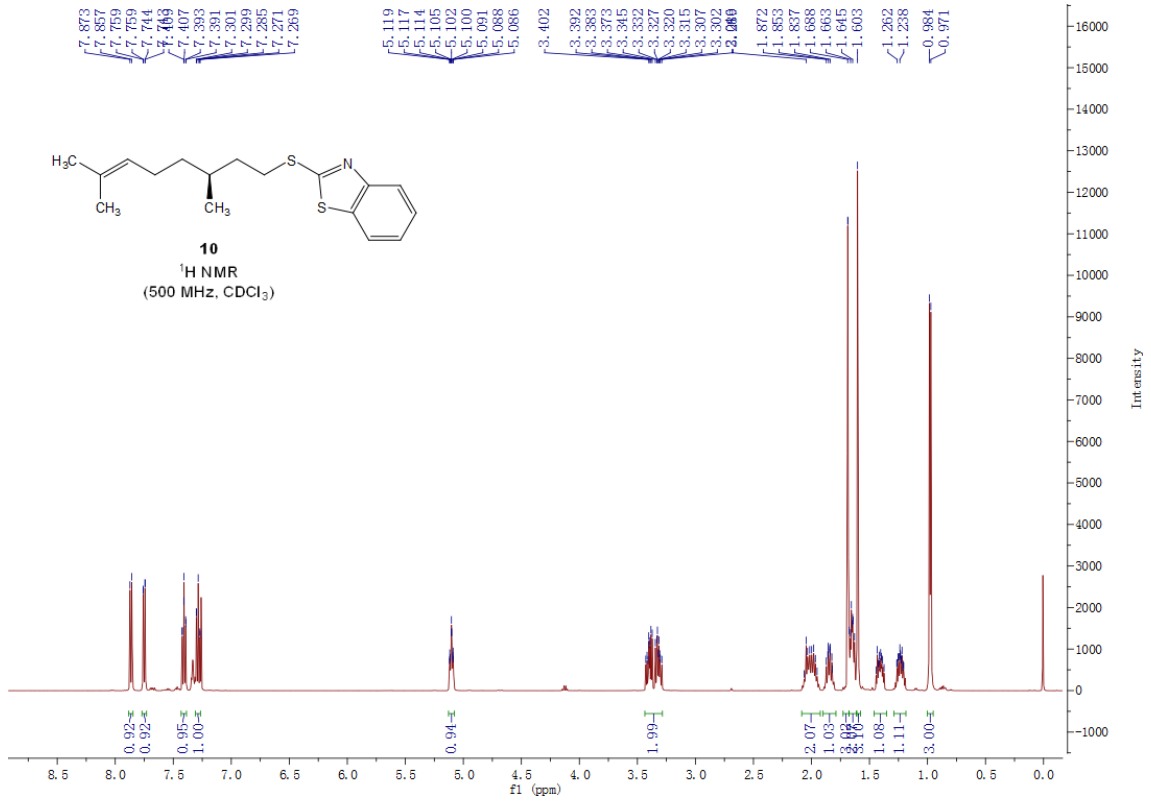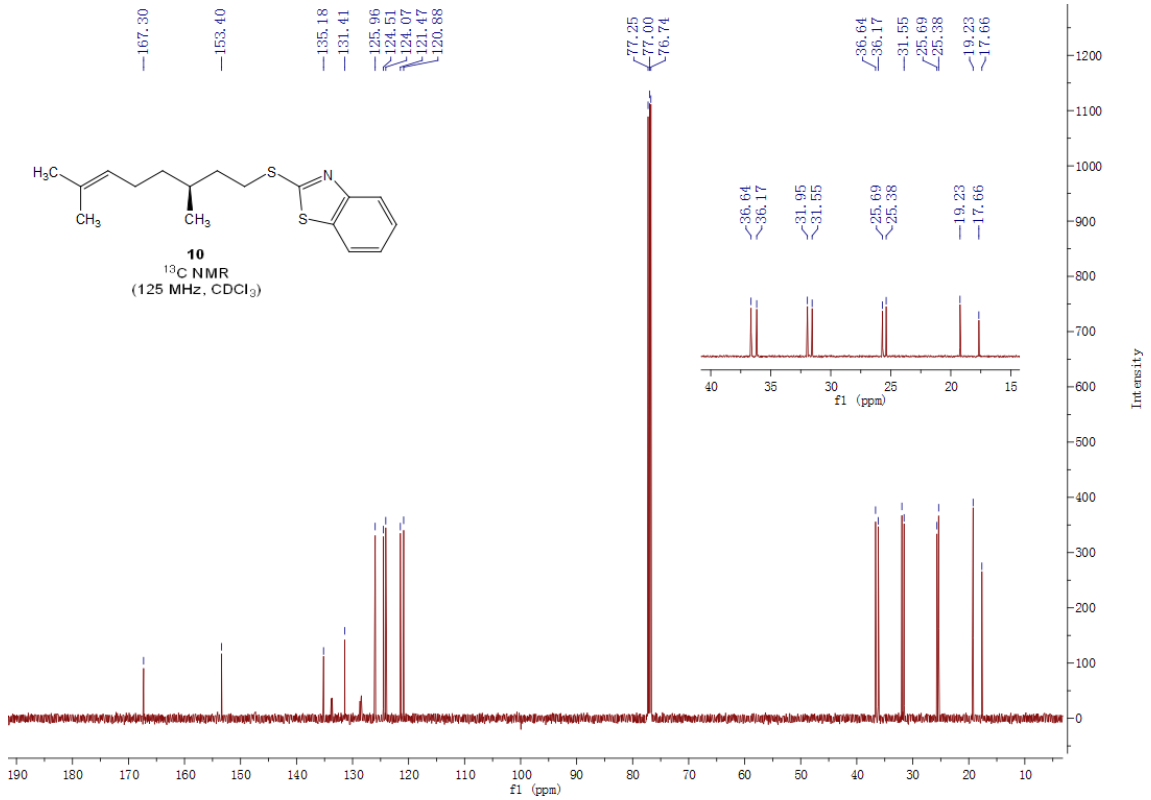

HPLC analysis: Daicel Chiralcel OD-H column; hexane/*i*-propanol = 99:1, 0.7 mL/min,  $\lambda = 214$  nm;  
 $t_R$  (major) = 15.97 min,  $t_R$  (minor) = 22.29 min. 97% *ee*.

## HPLC Report

Sample Name: SZF-0819 +- OD-H 991 214 0.7      Recording Time: 2017.08.23 09:32

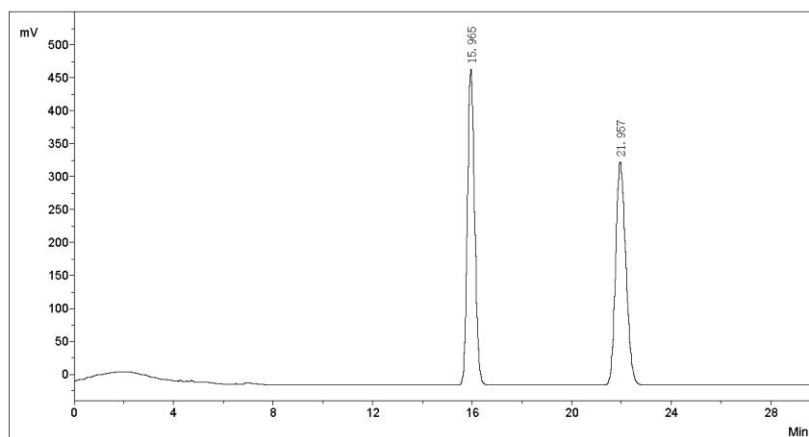

| No.   | PeakNo | ID. Name | R. Time | PeakHeight | PeakArea   | Conc     |
|-------|--------|----------|---------|------------|------------|----------|
| 1     | 1      |          | 15.965  | 479425.7   | 9696007.1  | 50.1400  |
| 2     | 2      |          | 21.957  | 338341.2   | 9641864.7  | 49.8600  |
| Total |        |          |         | 817766.9   | 19337871.8 | 100.0000 |
| No.   | IDName | Mi (ug)  | MO (ug) | Gm (ug/m3) | Gc (mg/m3) |          |

# HPLC Report

Sample Name:SZF-0819 chiral OD-H 991 214 0.7 Recording Time:2017.08.23 10:06

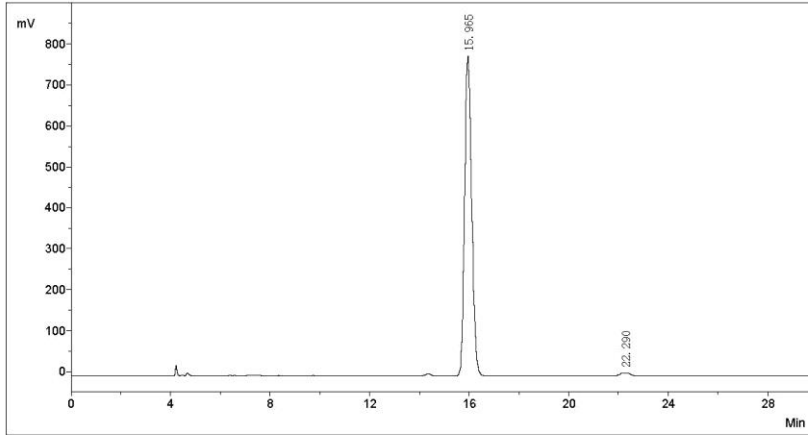

| No.   | PeakNo | ID.Name | R. Time | PeakHeight | PeakArea   | Conc     |
|-------|--------|---------|---------|------------|------------|----------|
| 1     | 1      |         | 15.965  | 780448.0   | 15495238.6 | 98.5901  |
| 2     | 2      |         | 22.290  | 7816.9     | 221587.9   | 1.4099   |
| Total |        |         |         | 788265.0   | 15716826.5 | 100.0000 |

  

| No. | IDName | Mi (ug) | MO (ug) | Cm (ug/m3) | Cc (mg/m3) |
|-----|--------|---------|---------|------------|------------|
|     |        |         |         |            |            |

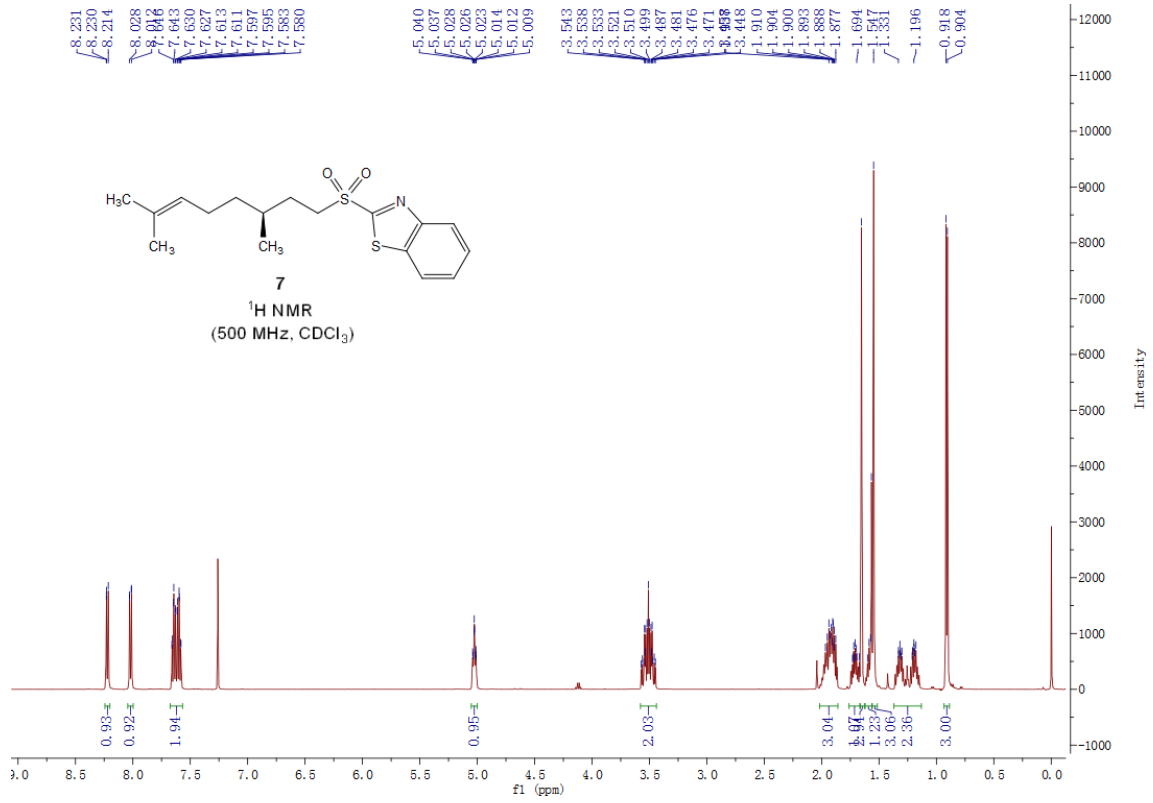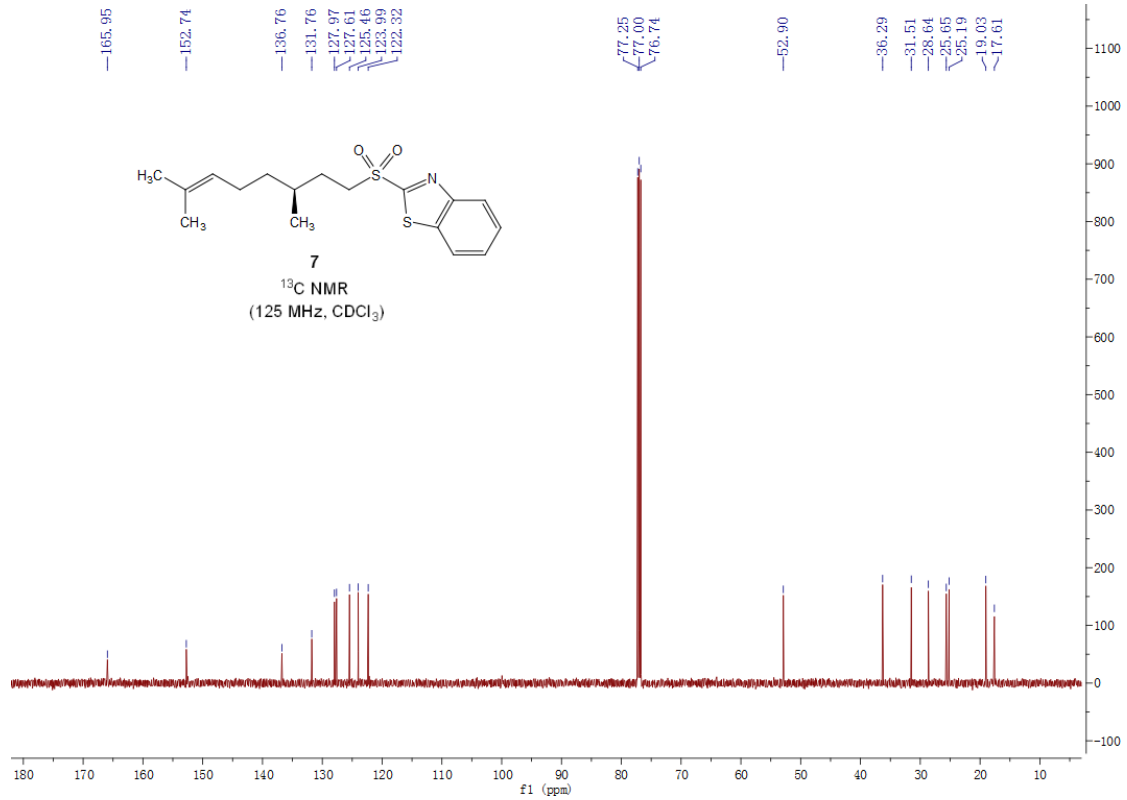

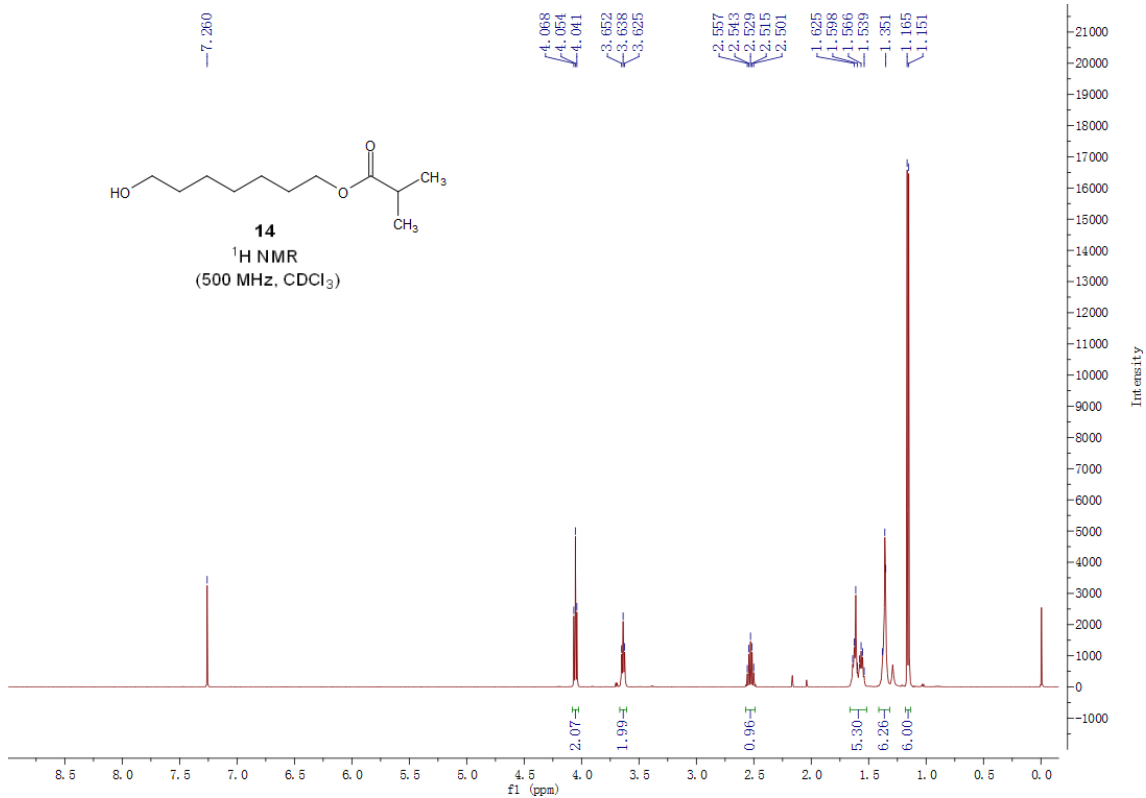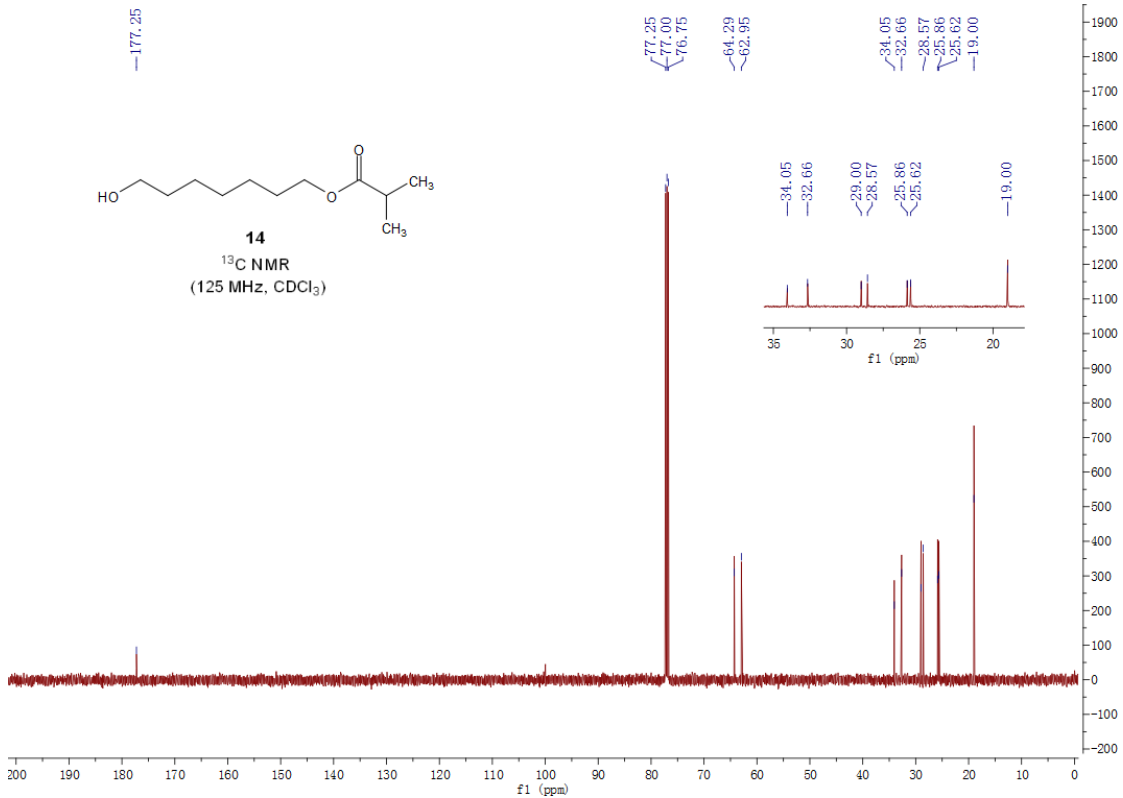

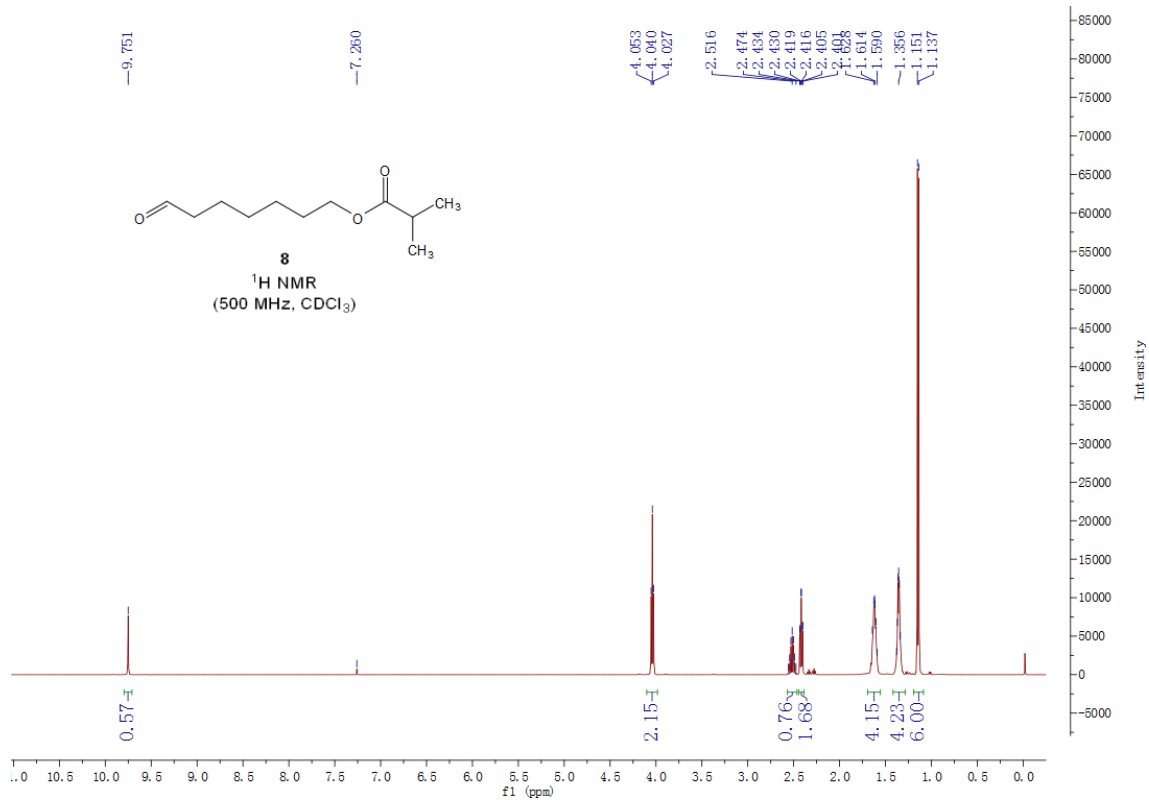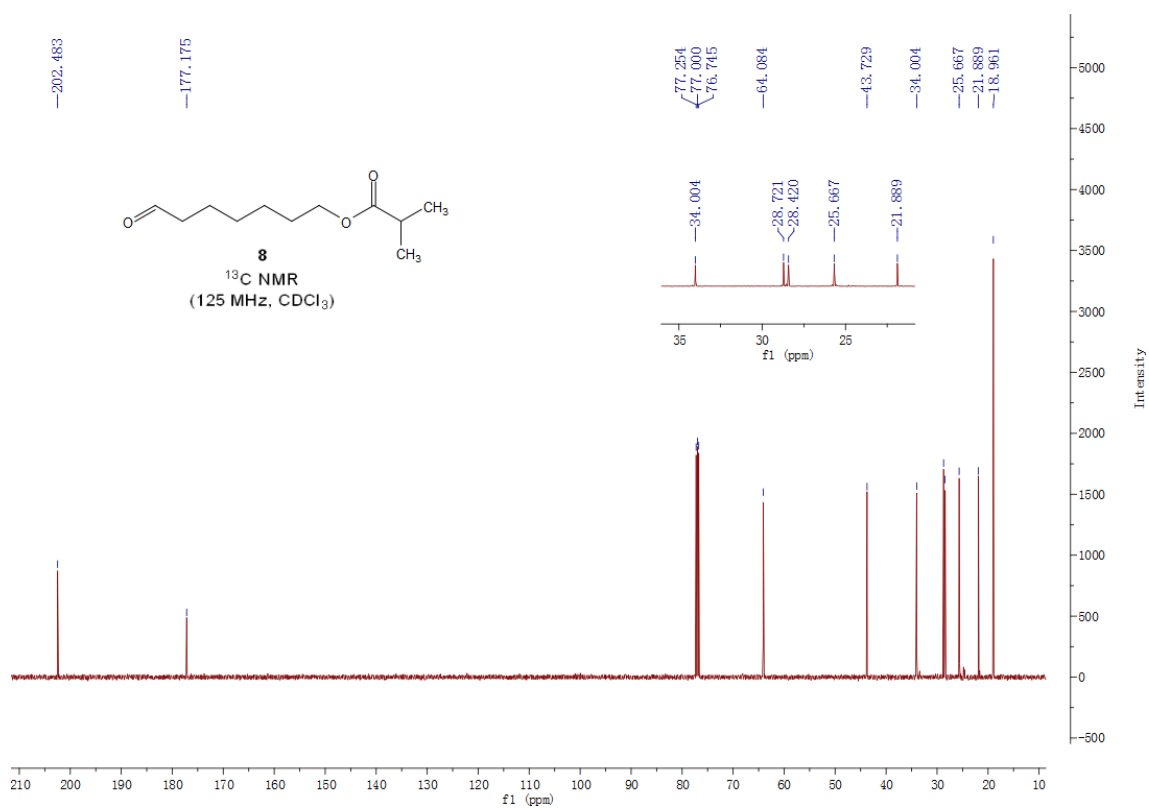

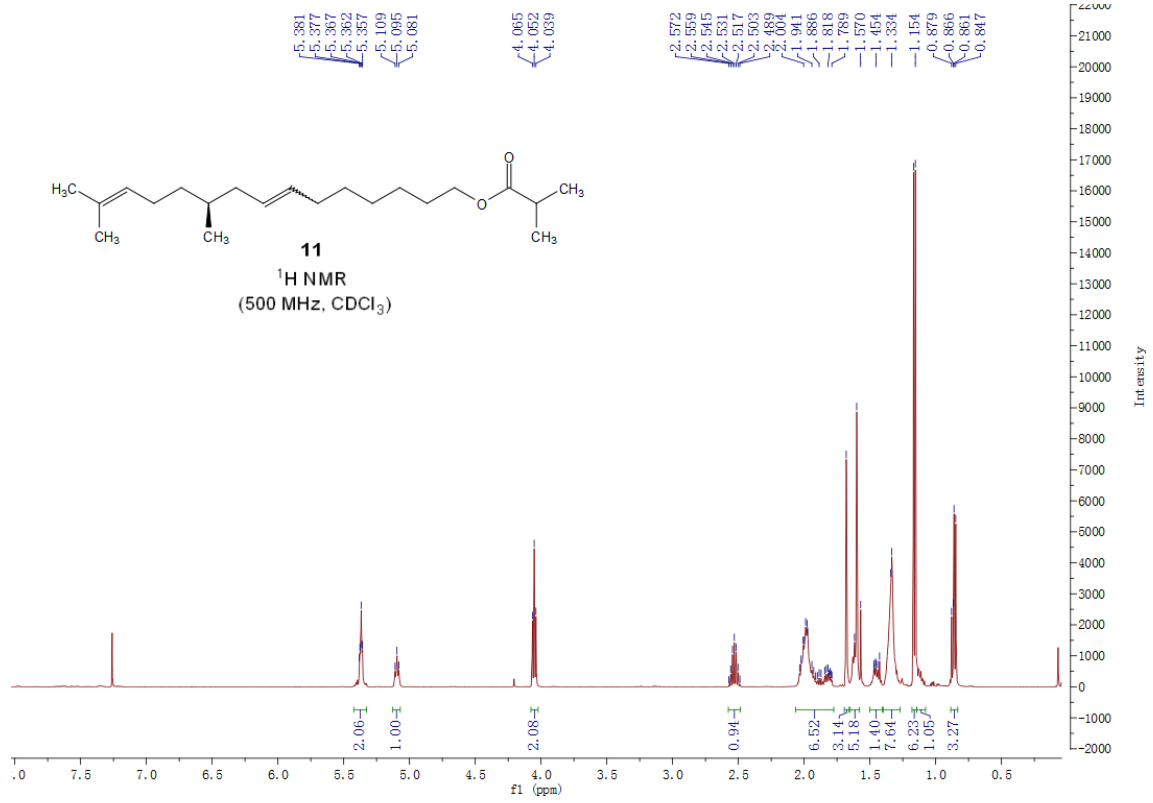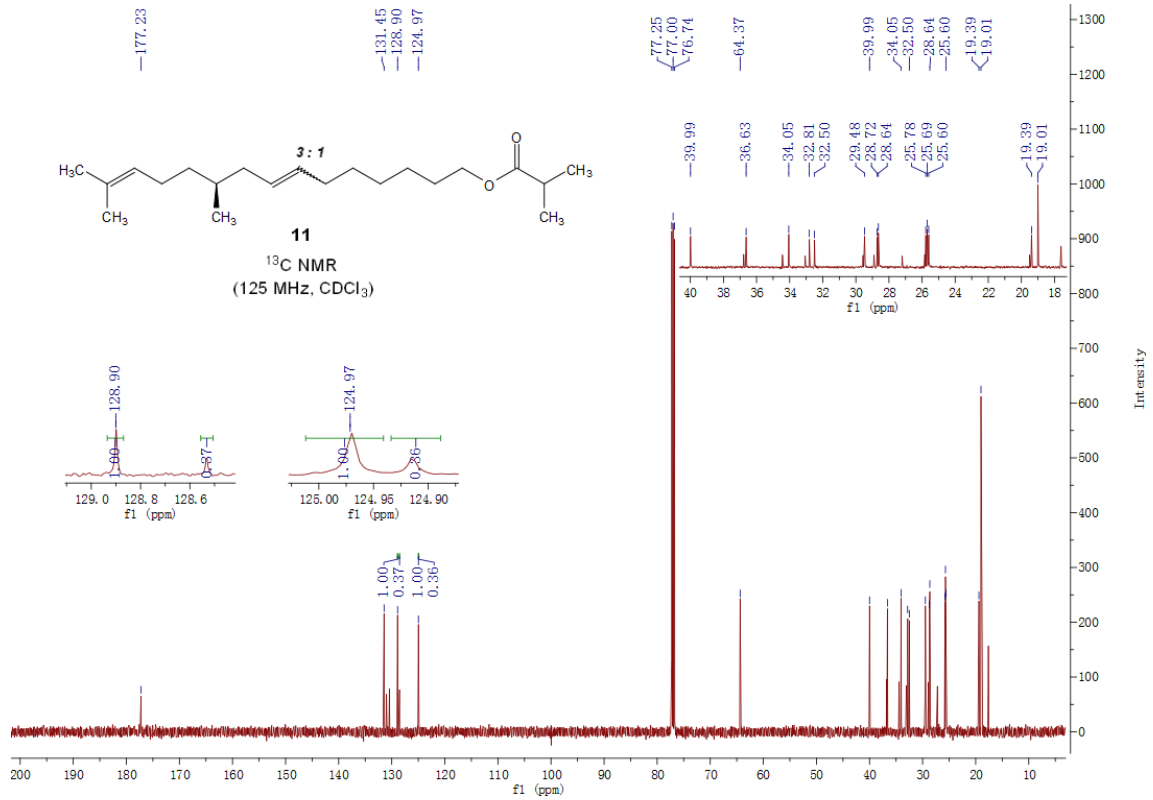



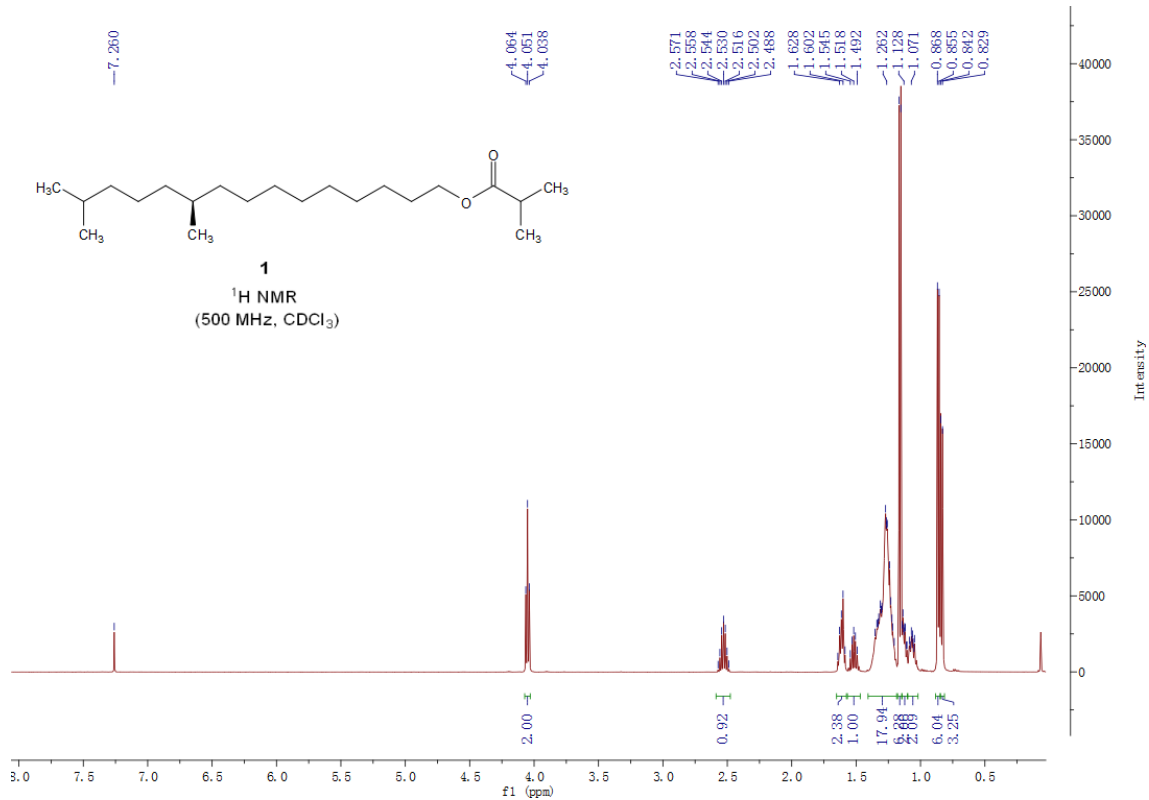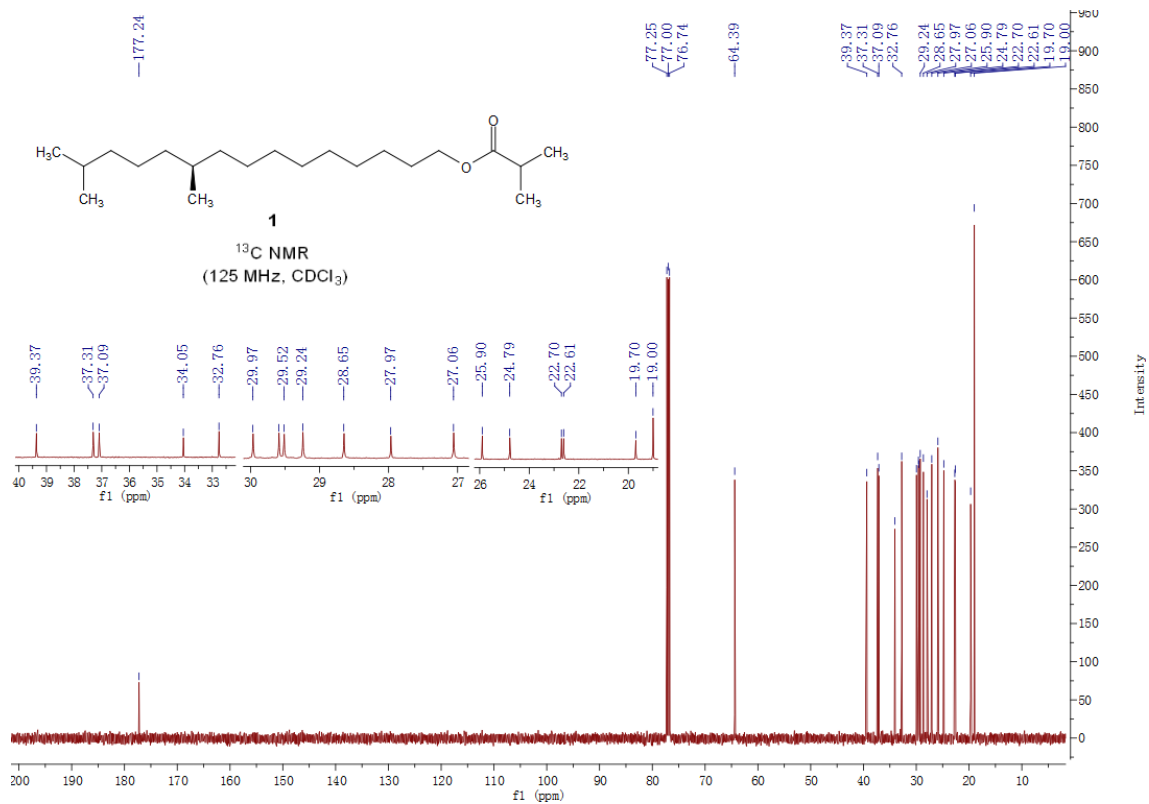

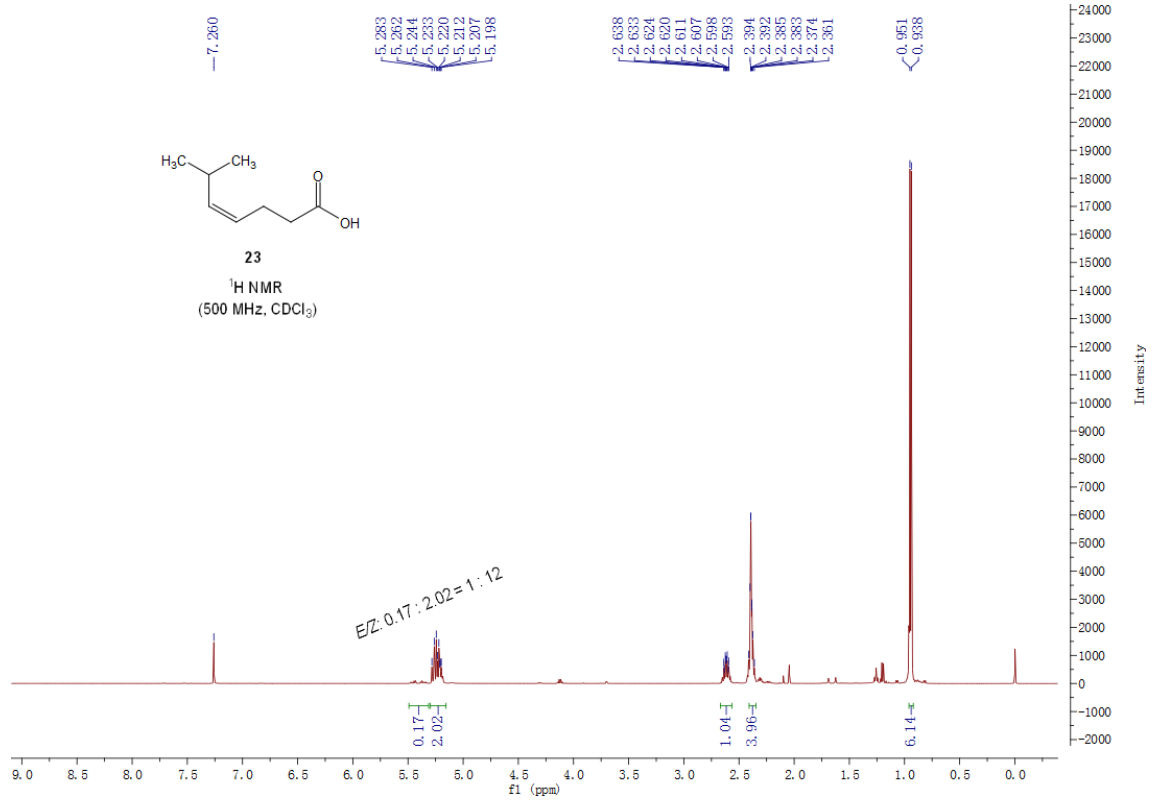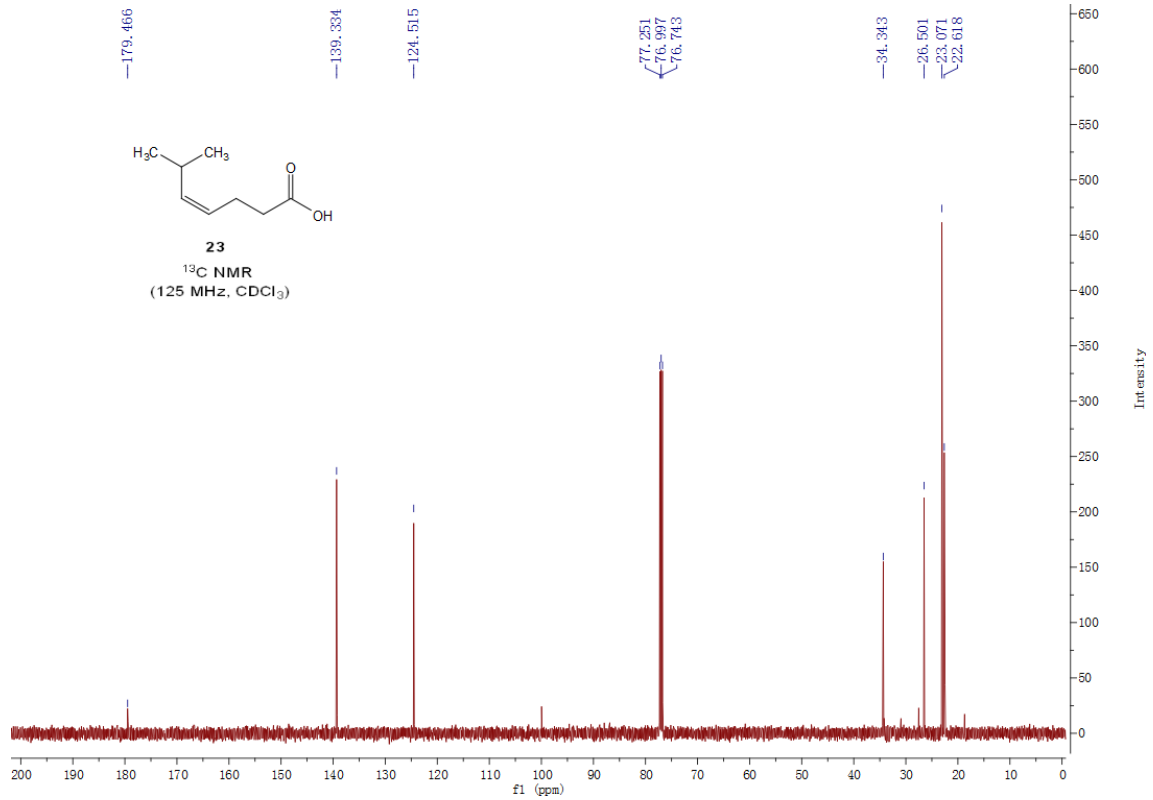

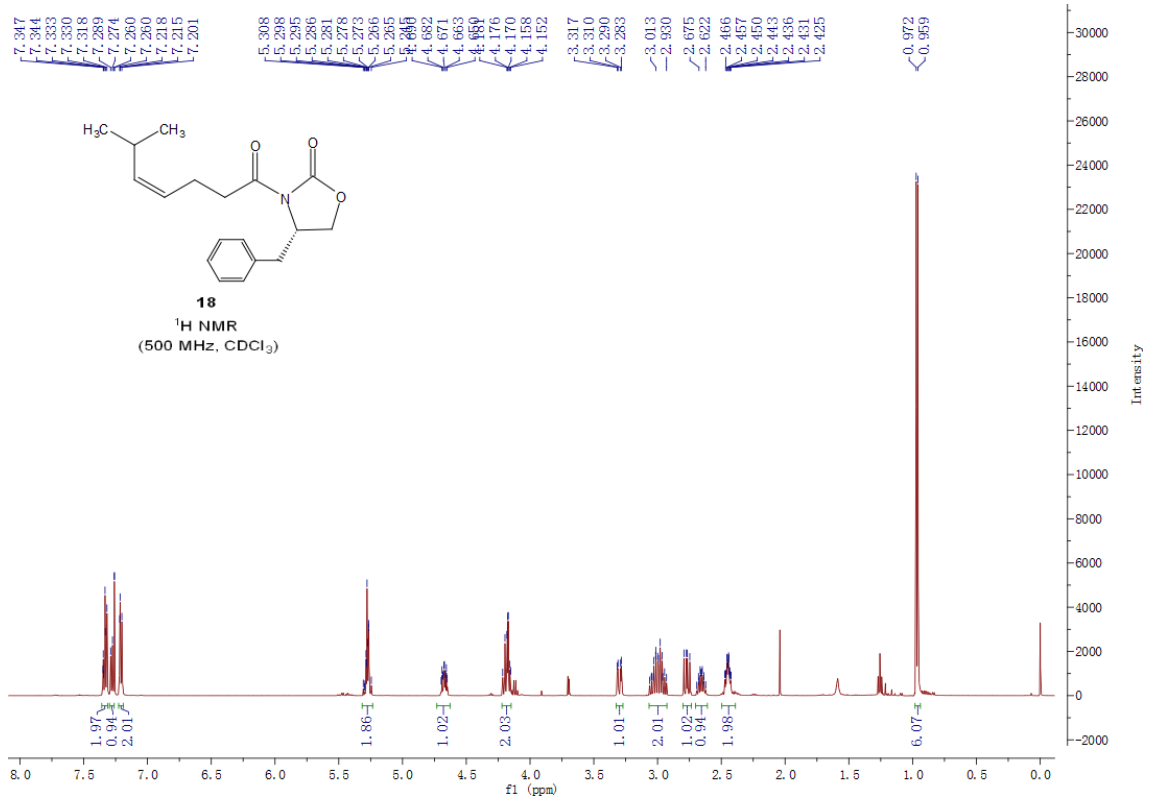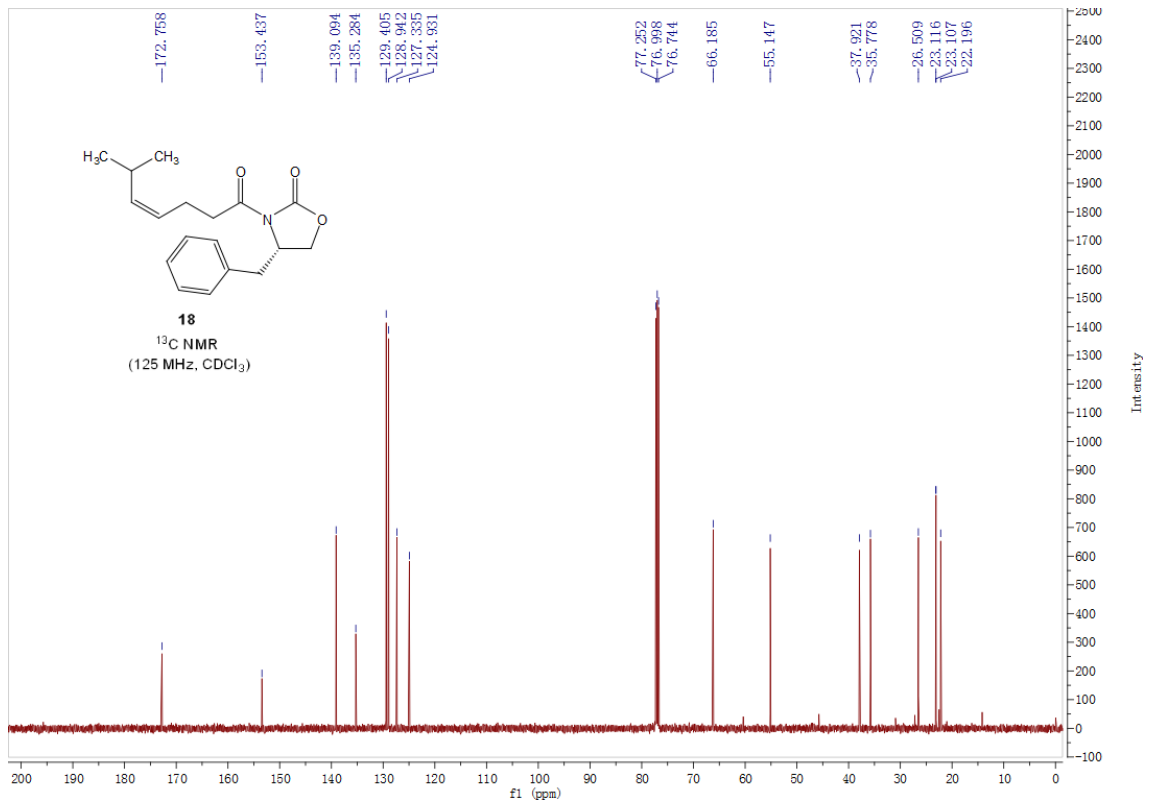

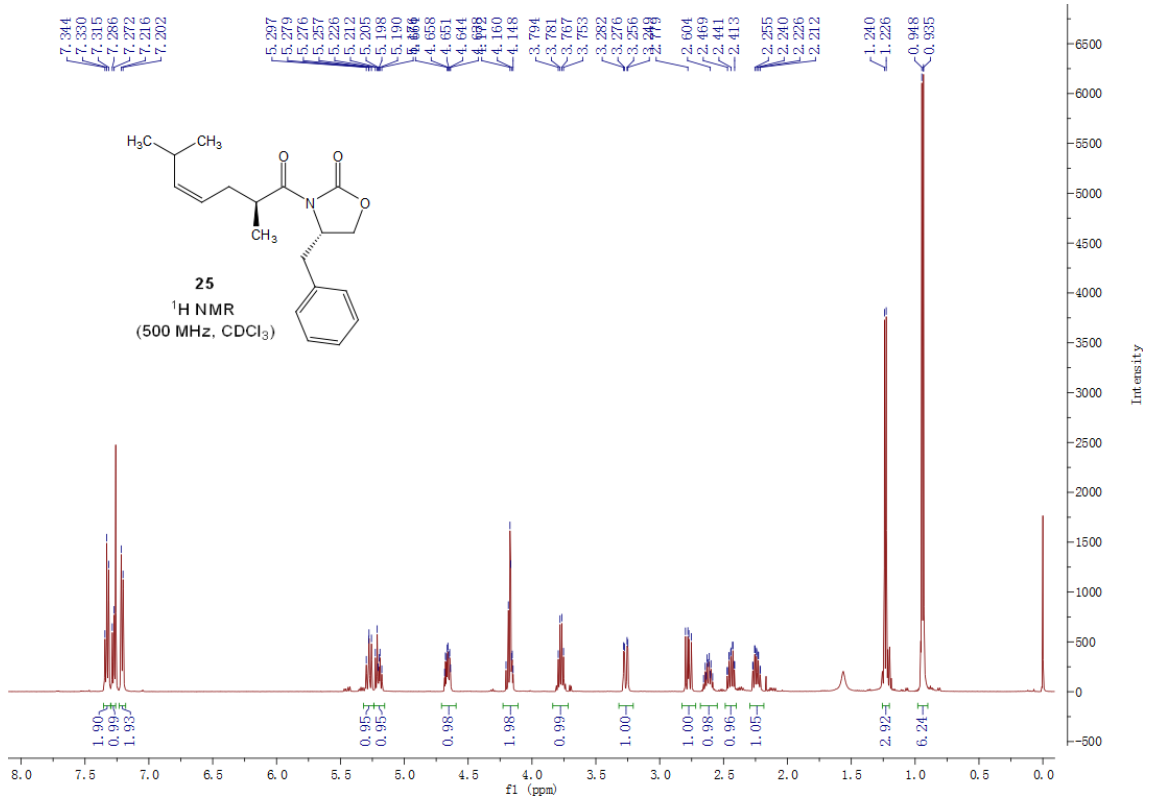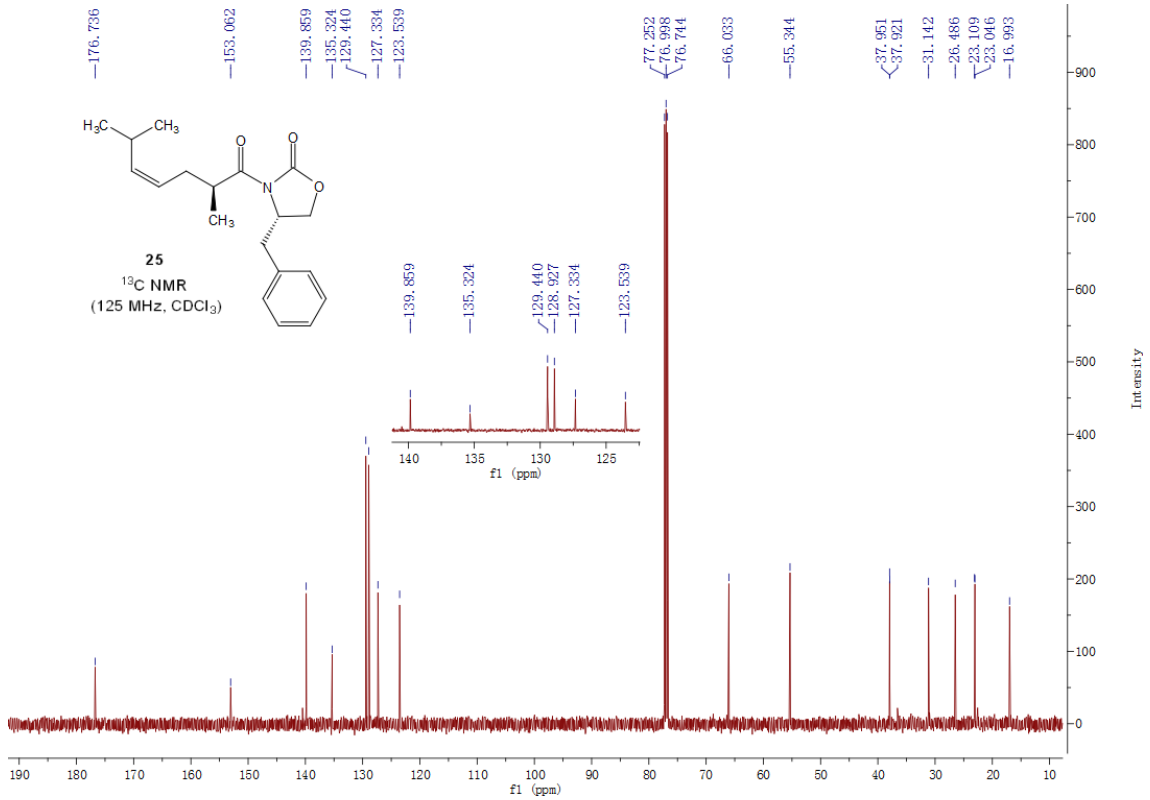

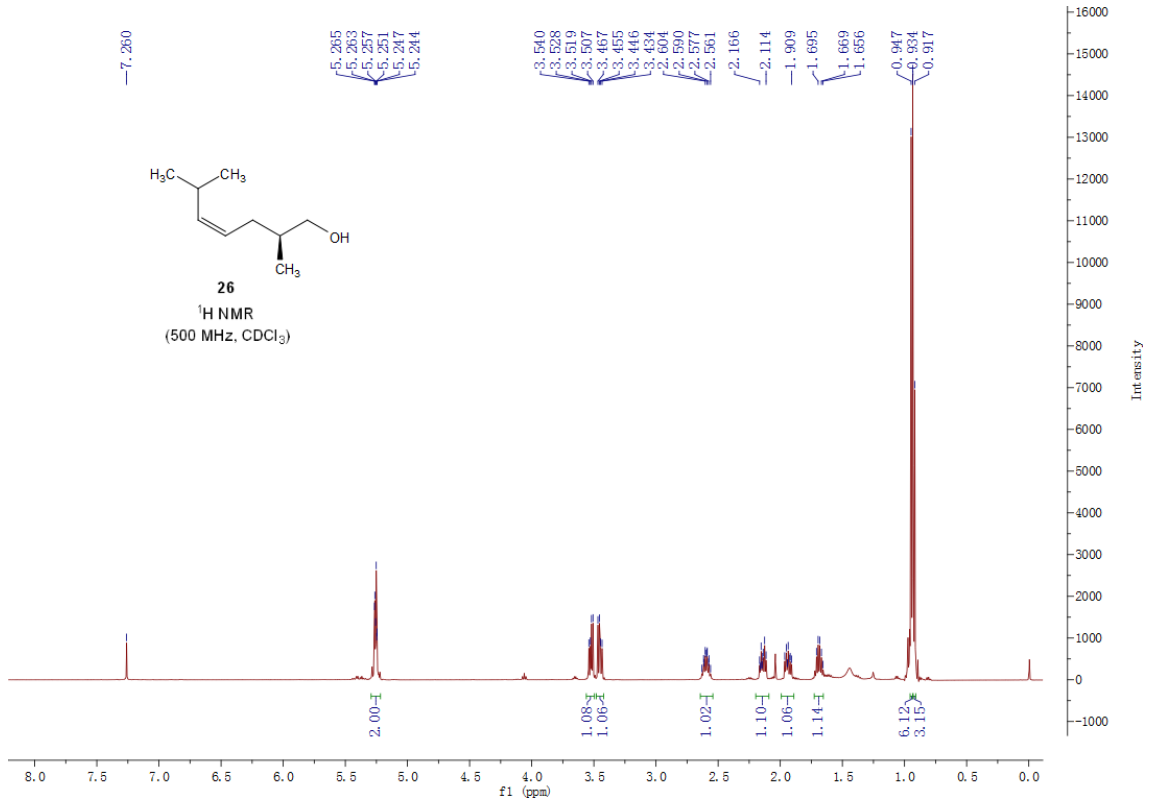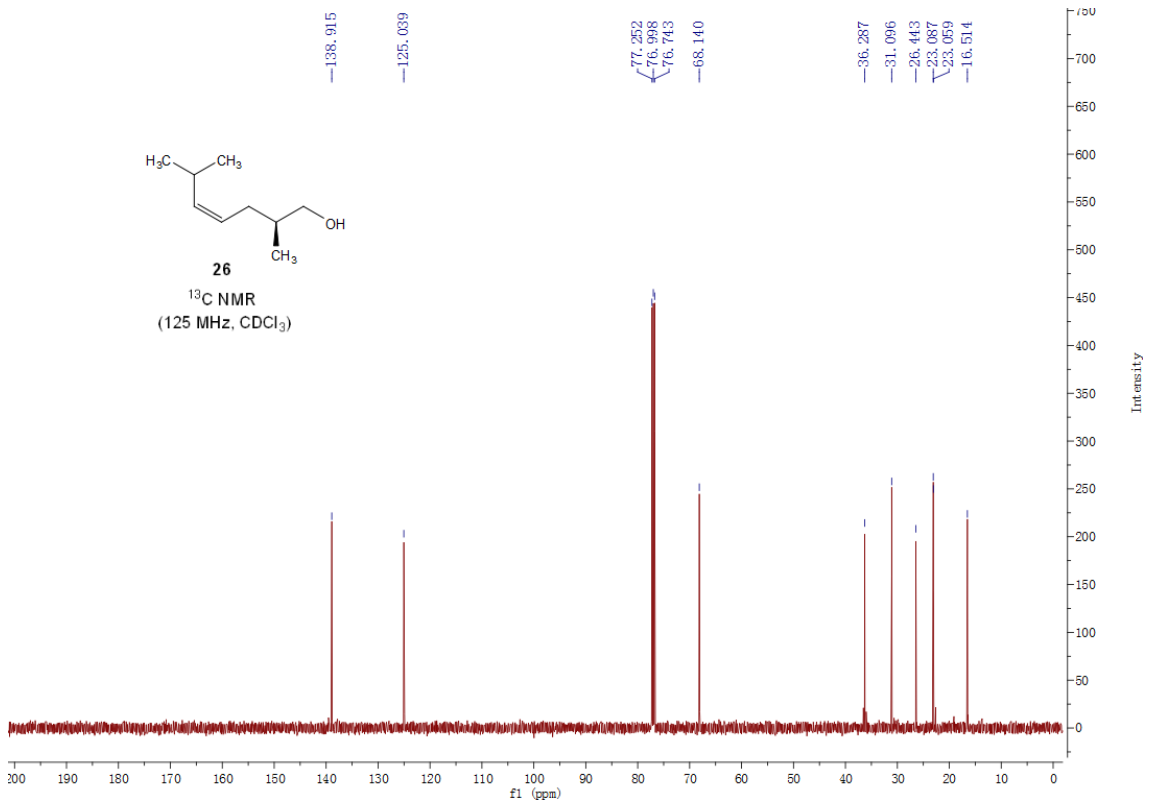

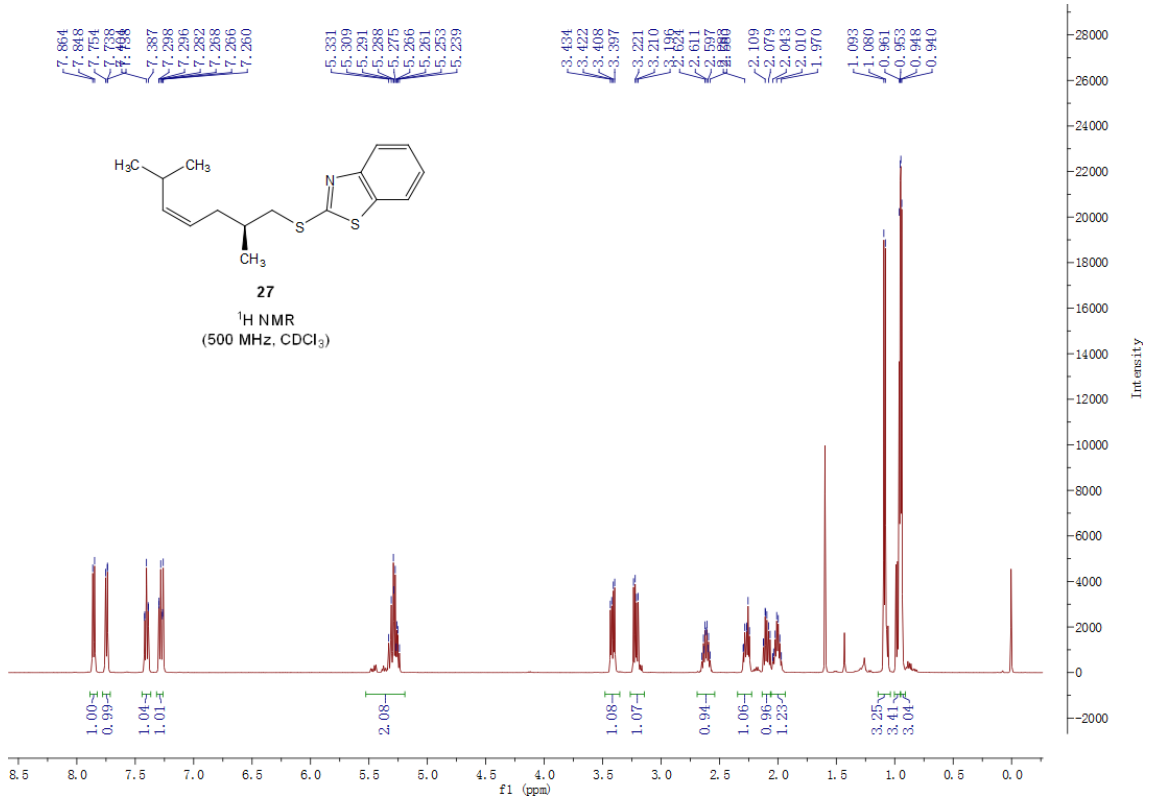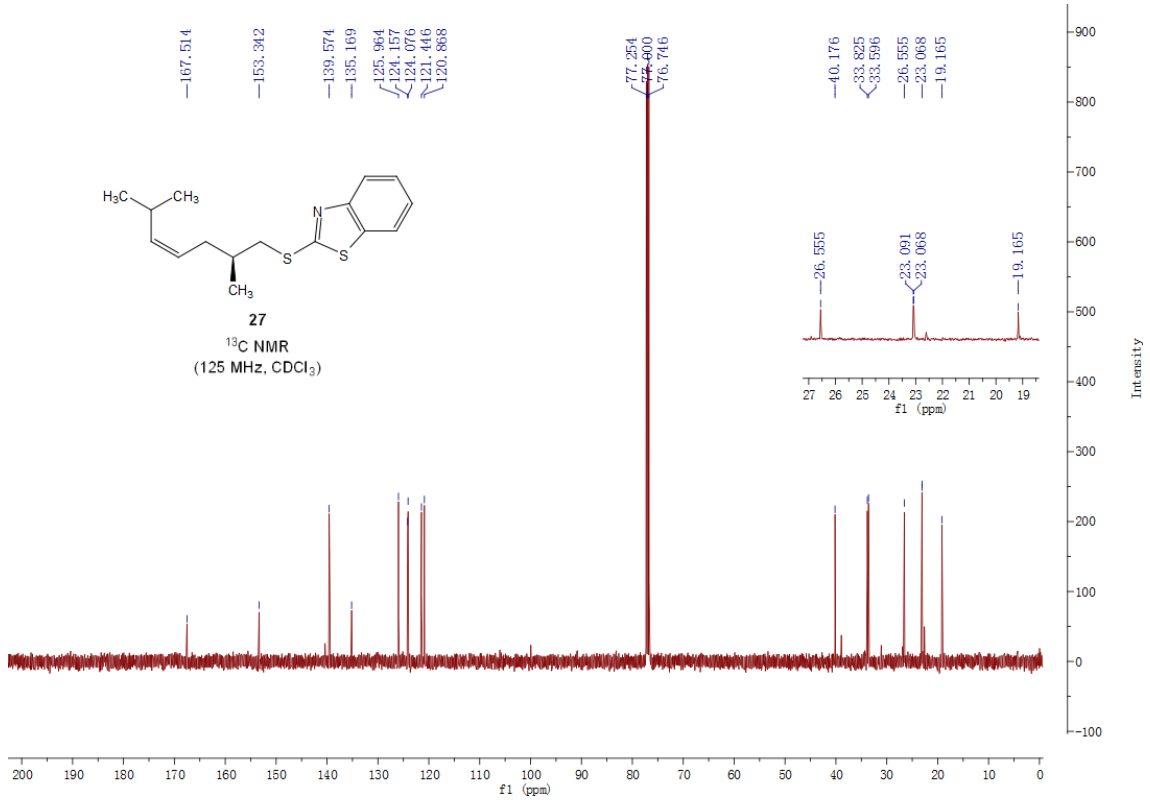

Preparation of *rac-27*:

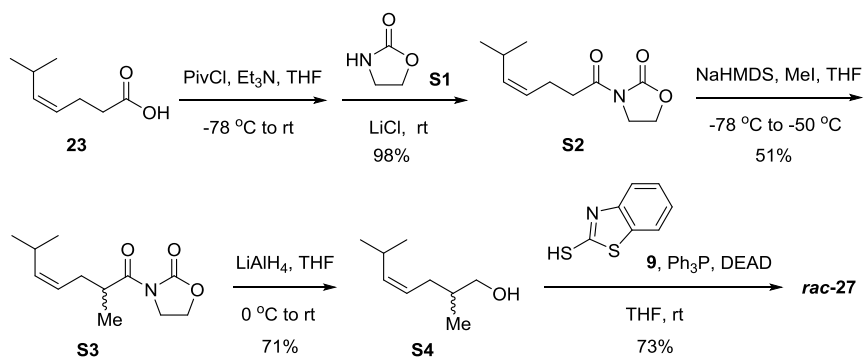

HPLC analysis: Daicel Chiralcel OD-H column; hexane/*i*-propanol = 99:1, 0.7 mL/min,  $\lambda = 214\text{ nm}$ ;  $t_R$  (major) = 10.12 min,  $t_R$  (minor) = 11.30 min. 95% *ee*.

### HPLC Report

Sample Name: SZF-S165+- OD-H 991 214 0.7 Recording Time: 2017.08.22 22:31

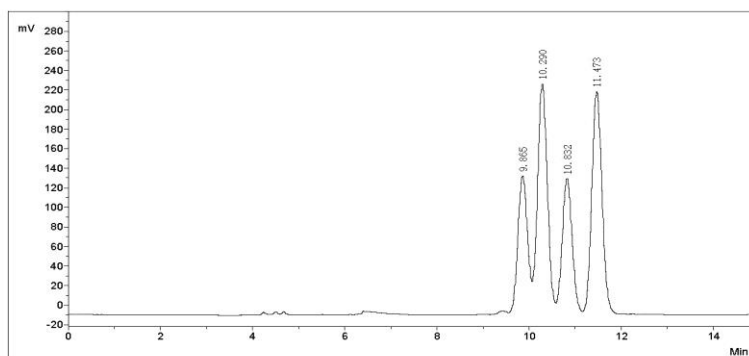

| No. | PeakNo | ID. Name | R. Time | PeakHeight | PeakArea  | Conc    |
|-----|--------|----------|---------|------------|-----------|---------|
| 1   | 1      |          | 9.865   | 139826.3   | 2014887.3 | 18.2425 |
| 2   | 2      |          | 10.290  | 234094.6   | 3475184.8 | 31.4638 |
| 3   | 3      |          | 10.832  | 137590.0   | 2072554.1 | 18.7646 |
| 4   | 4      |          | 11.473  | 227175.7   | 3482391.4 | 31.5291 |

Total 738686.5 11045017.6 100.0000

| No. | IDName | Mi (ug) | MO (ug) | Cm (ug/m3) | Cc (mg/m3) |
|-----|--------|---------|---------|------------|------------|
|-----|--------|---------|---------|------------|------------|

# HPLC Report

Sample Name:SZF-S165-GH OD-H 991 214 0.7

Recording Time:2017.08.22 22:15

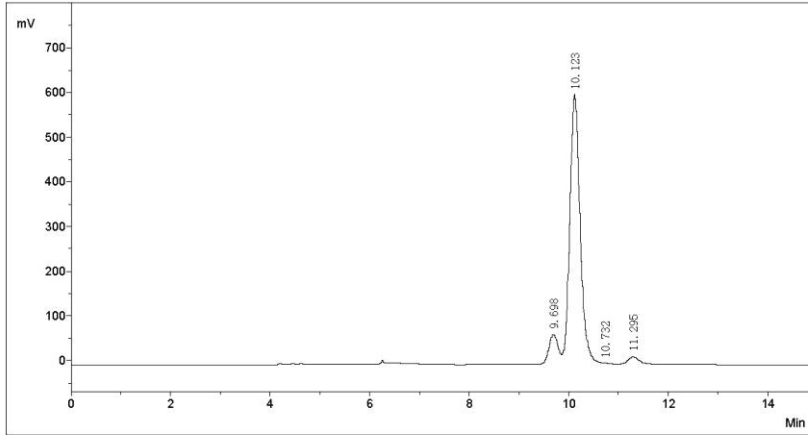

| No.   | PeakNo | ID.Name | R.Time  | PeakHeight | PeakArea   | Conc     |
|-------|--------|---------|---------|------------|------------|----------|
| 1     | 1      |         | 9.698   | 67025.6    | 879574.1   | 8.9647   |
| 2     | 2      |         | 10.123  | 603686.5   | 8670450.5  | 88.3705  |
| 3     | 3      |         | 10.732  | 2521.3     | 22165.1    | 0.2259   |
| 4     | 4      |         | 11.295  | 16311.0    | 239289.9   | 2.4389   |
| Total |        |         |         | 689544.3   | 9811479.5  | 100.0000 |
| No.   | IDName | Mi (ug) | MO (ug) | Om (ug/m3) | Cc (mg/m3) |          |



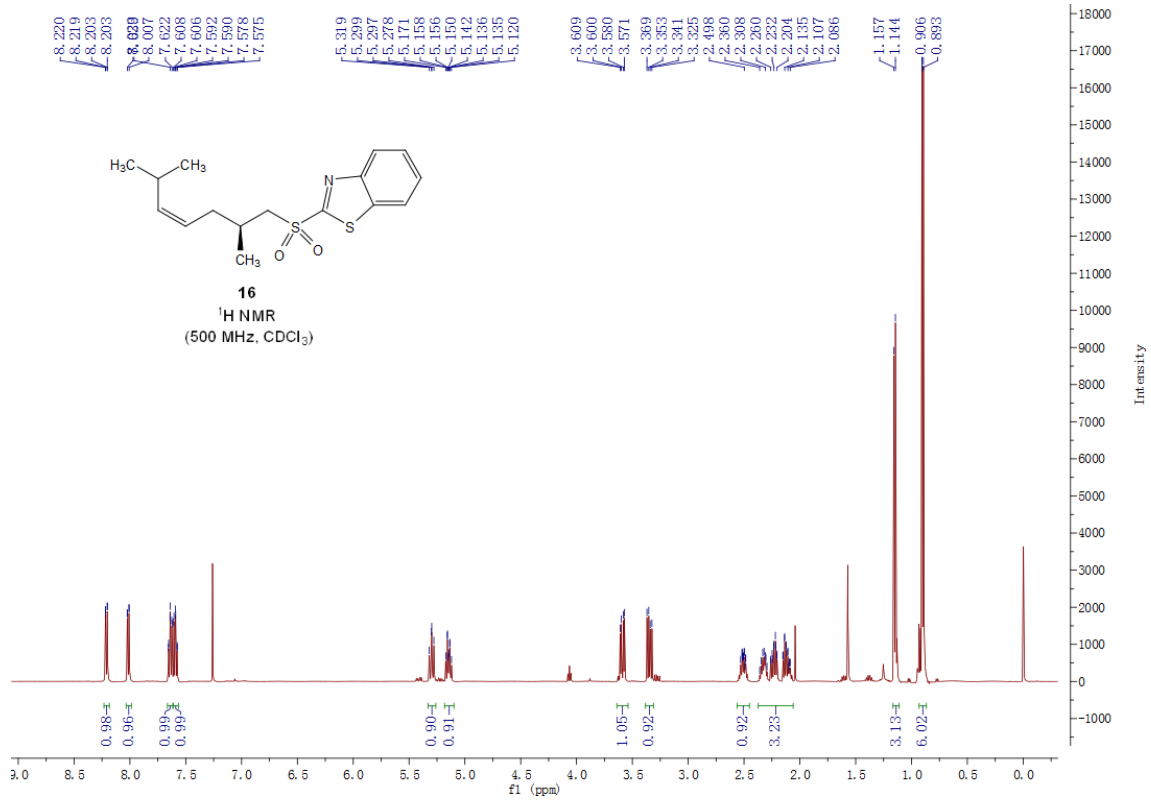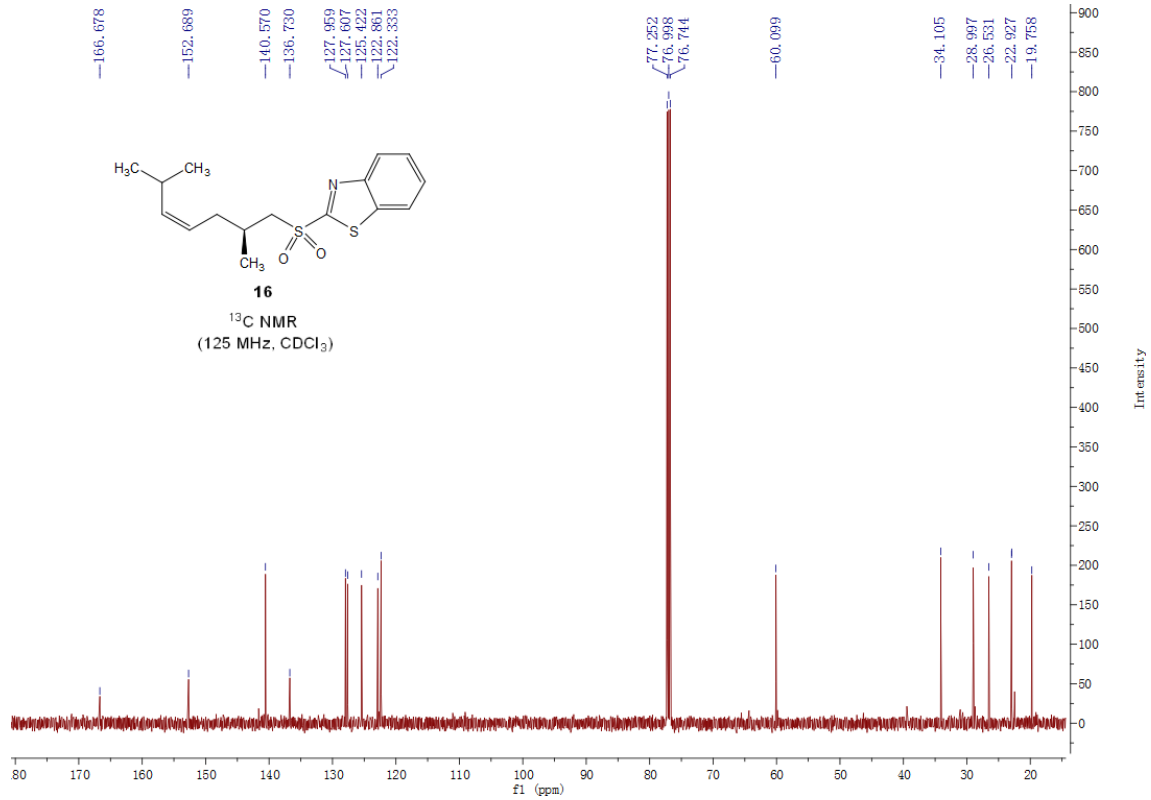

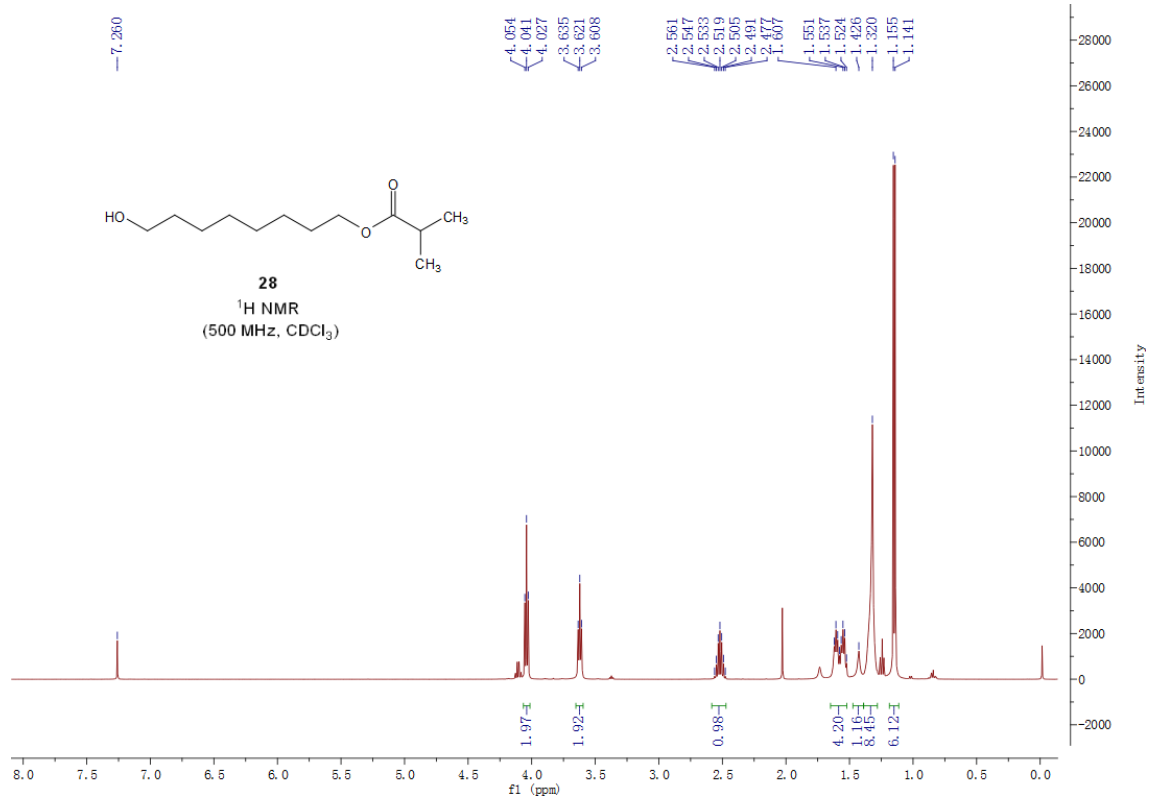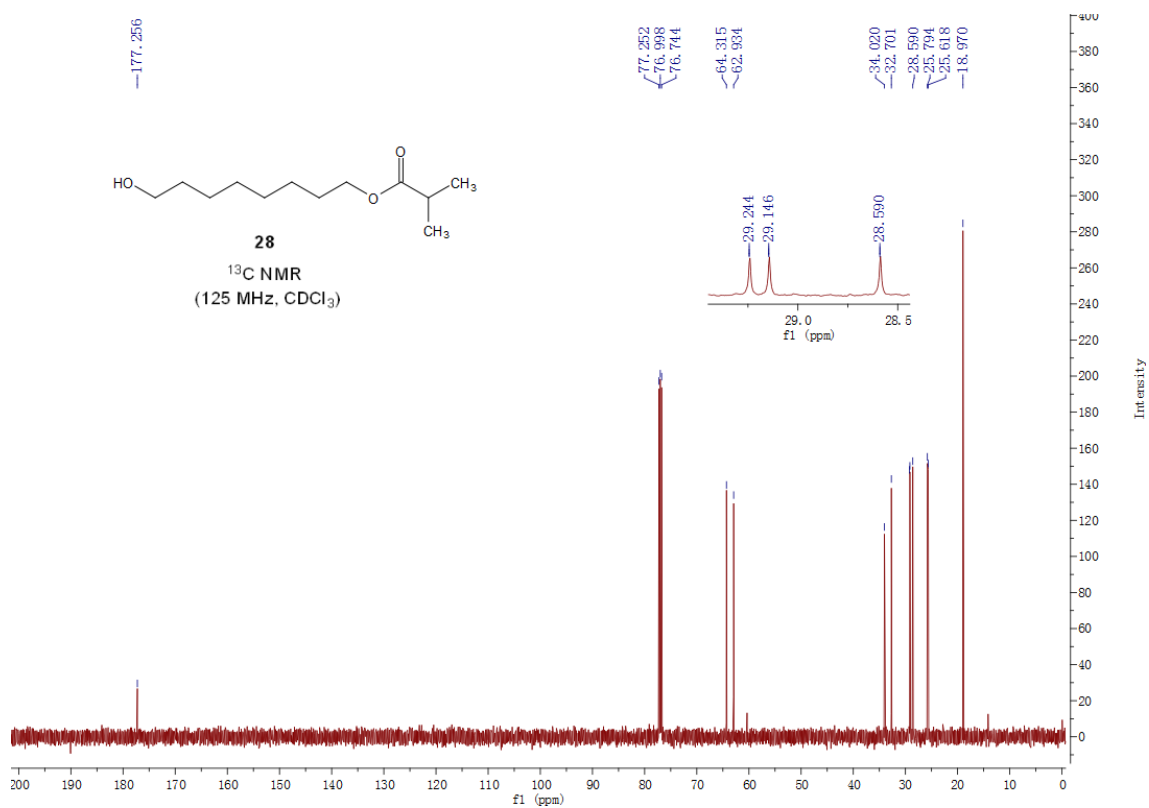

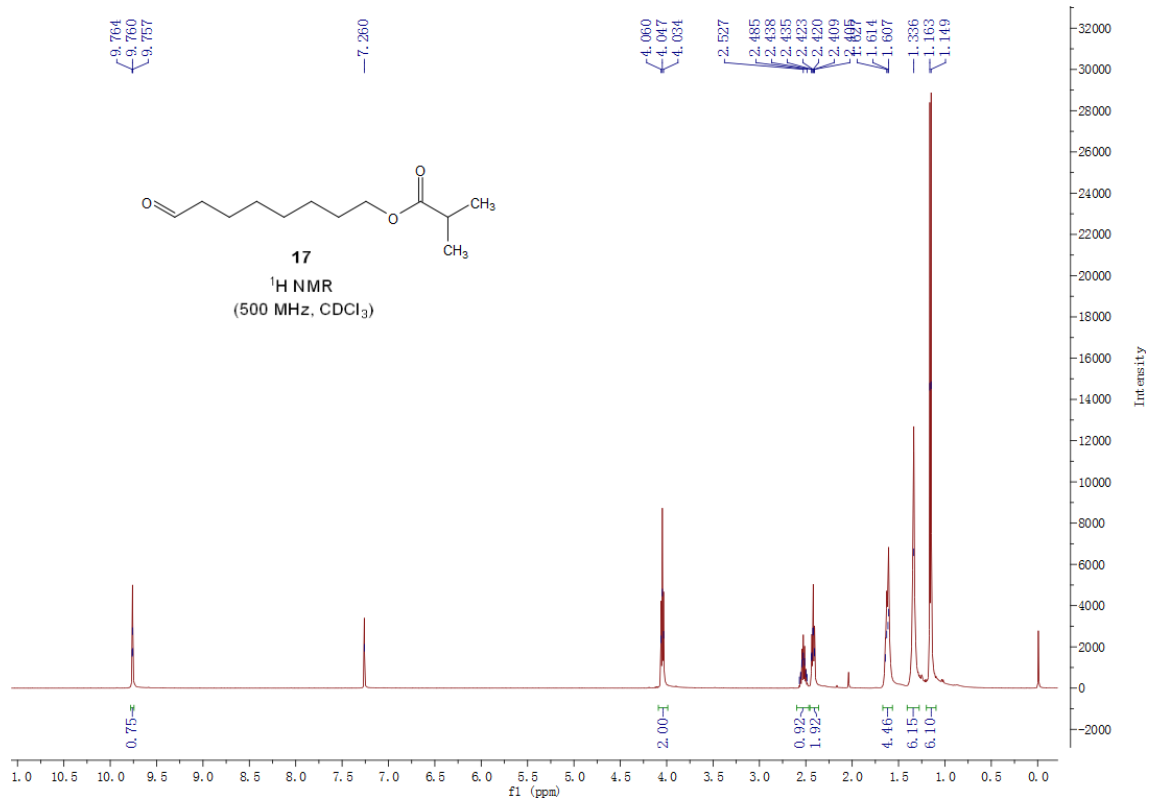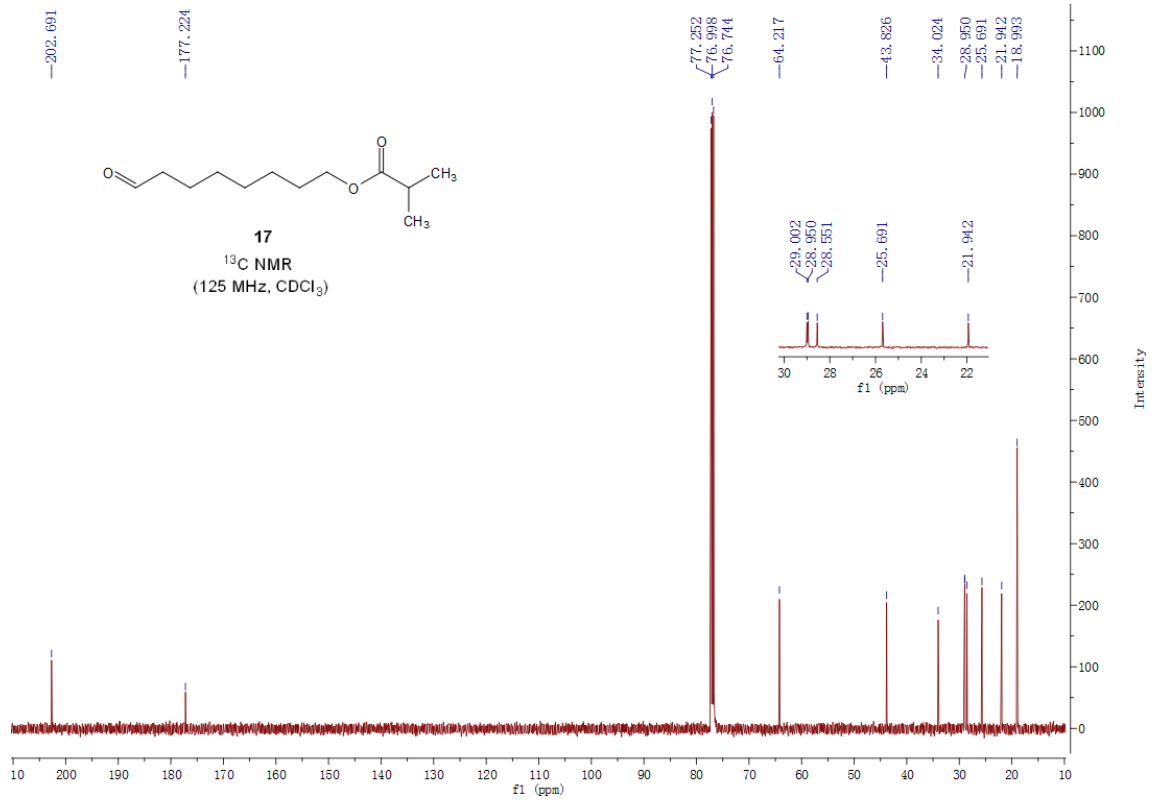

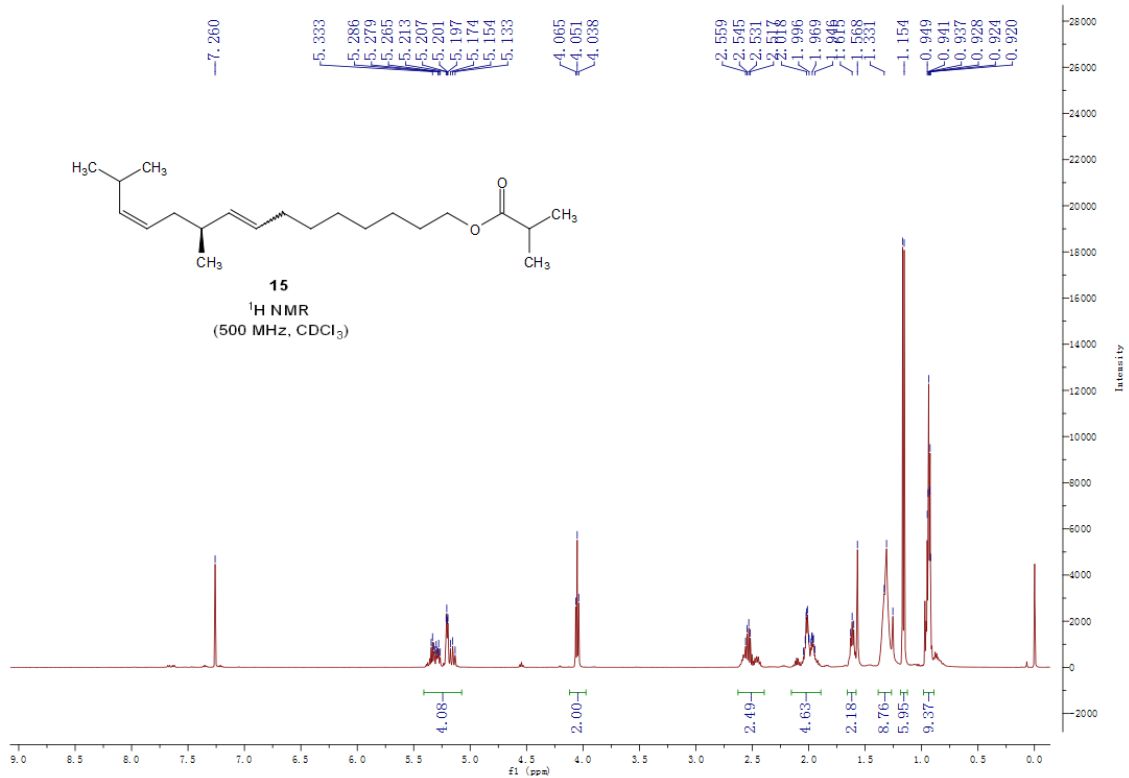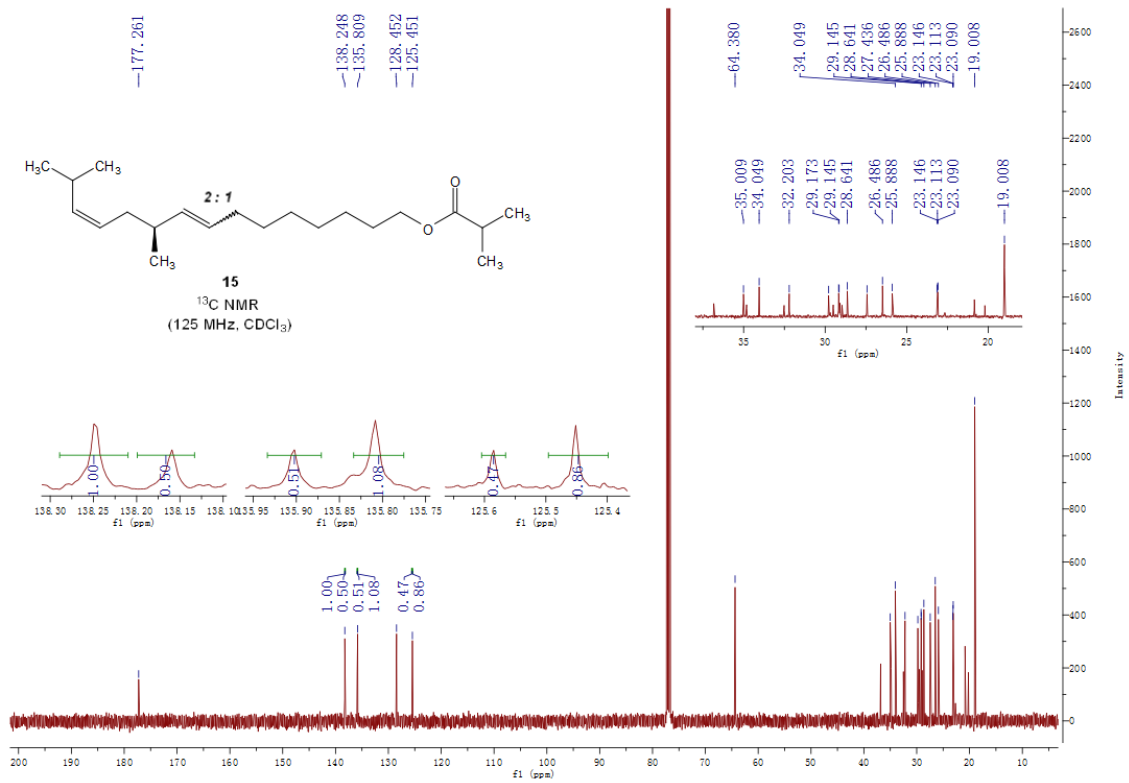

Supplement: NIHMS908555-supplement.pdf [file NIHMS908555-supplement.pdf]
